# Supplementary material
Source: Springer Nature journal article supplement (https://www.springermedizin.de/resource/supplementary/12888_2011_988_MOESM1_ESM.pdf/9479634)
Supplement: MOESM1 [file 9479634]

**Assessed for eligibility**  
(n=112)

**Invited to SCID-I  
interview**  
(n=91)

**Randomized**  
(n=79)

**Treatment (n=40)**

Provided data at:

|                   |        |
|-------------------|--------|
| Week 0 (pre)      | (n=40) |
| Week 1            | (n=40) |
| Week 2            | (n=39) |
| Week 3            | (n=38) |
| Week 4 (post)     | (n=37) |
| 4 month follow-up | (n=37) |

**Placebo (n=39)**

Provided data at:

|                   |        |
|-------------------|--------|
| Week 0 (pre)      | (n=39) |
| Week 1            | (n=39) |
| Week 2            | (n=39) |
| Week 3            | (n=39) |
| Week 4 (post)     | (n=39) |
| 4 month follow-up | (n=37) |

**Analyzed (n=79)**

**Excluded (n=21)**

- Extremely high alcohol consumption (n=7)
- Ongoing psychological treatment (n=5)
- >3 on item 9, MADRS-S (n=4)
- Other primary problems (n=2)
- No computer (n=2)
- Use of drugs (n=1)

**Excluded (n=12)**

- Not social phobia according to SCID (n=7)
- Changed medicine dosage (n=2)
- Not reachable (n=2)
- Withdrew (n=1)
